# Supplementary material
Source: PubMed Central journal article supplement (PMC6535802)
Supplement: NIHMS1023934-supplement-Supplementary_figures_1-8.pdf [file NIHMS1023934-supplement-Supplementary_figures_1-8.pdf]

**Supplementary Figures:**

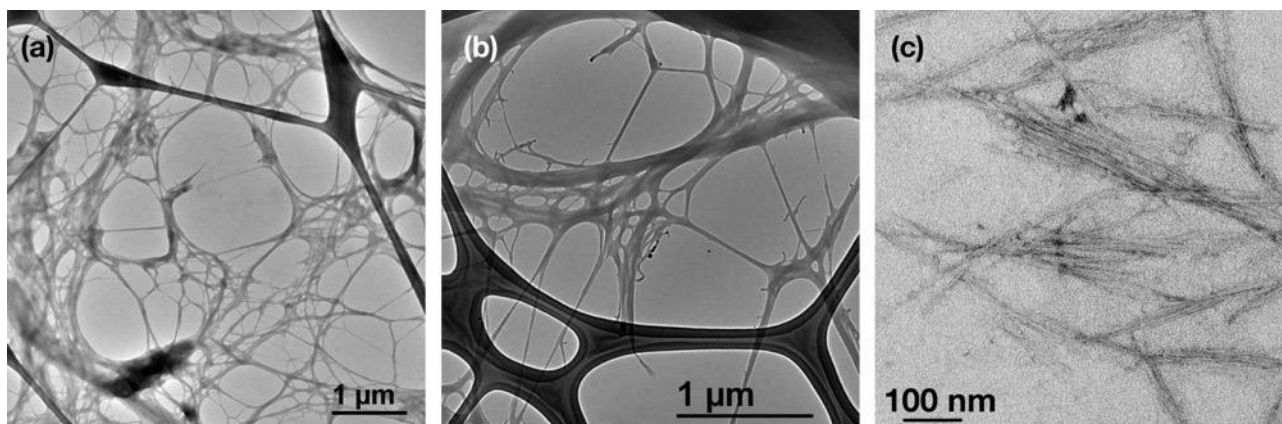

**Supplementary Figure 1 | TEM images of nanocellulose materials.** a. 50 nm Fibrillar nanocellulose (CNF), b. 80 nm CNF, c. cellulose nanocrystals (CNC).

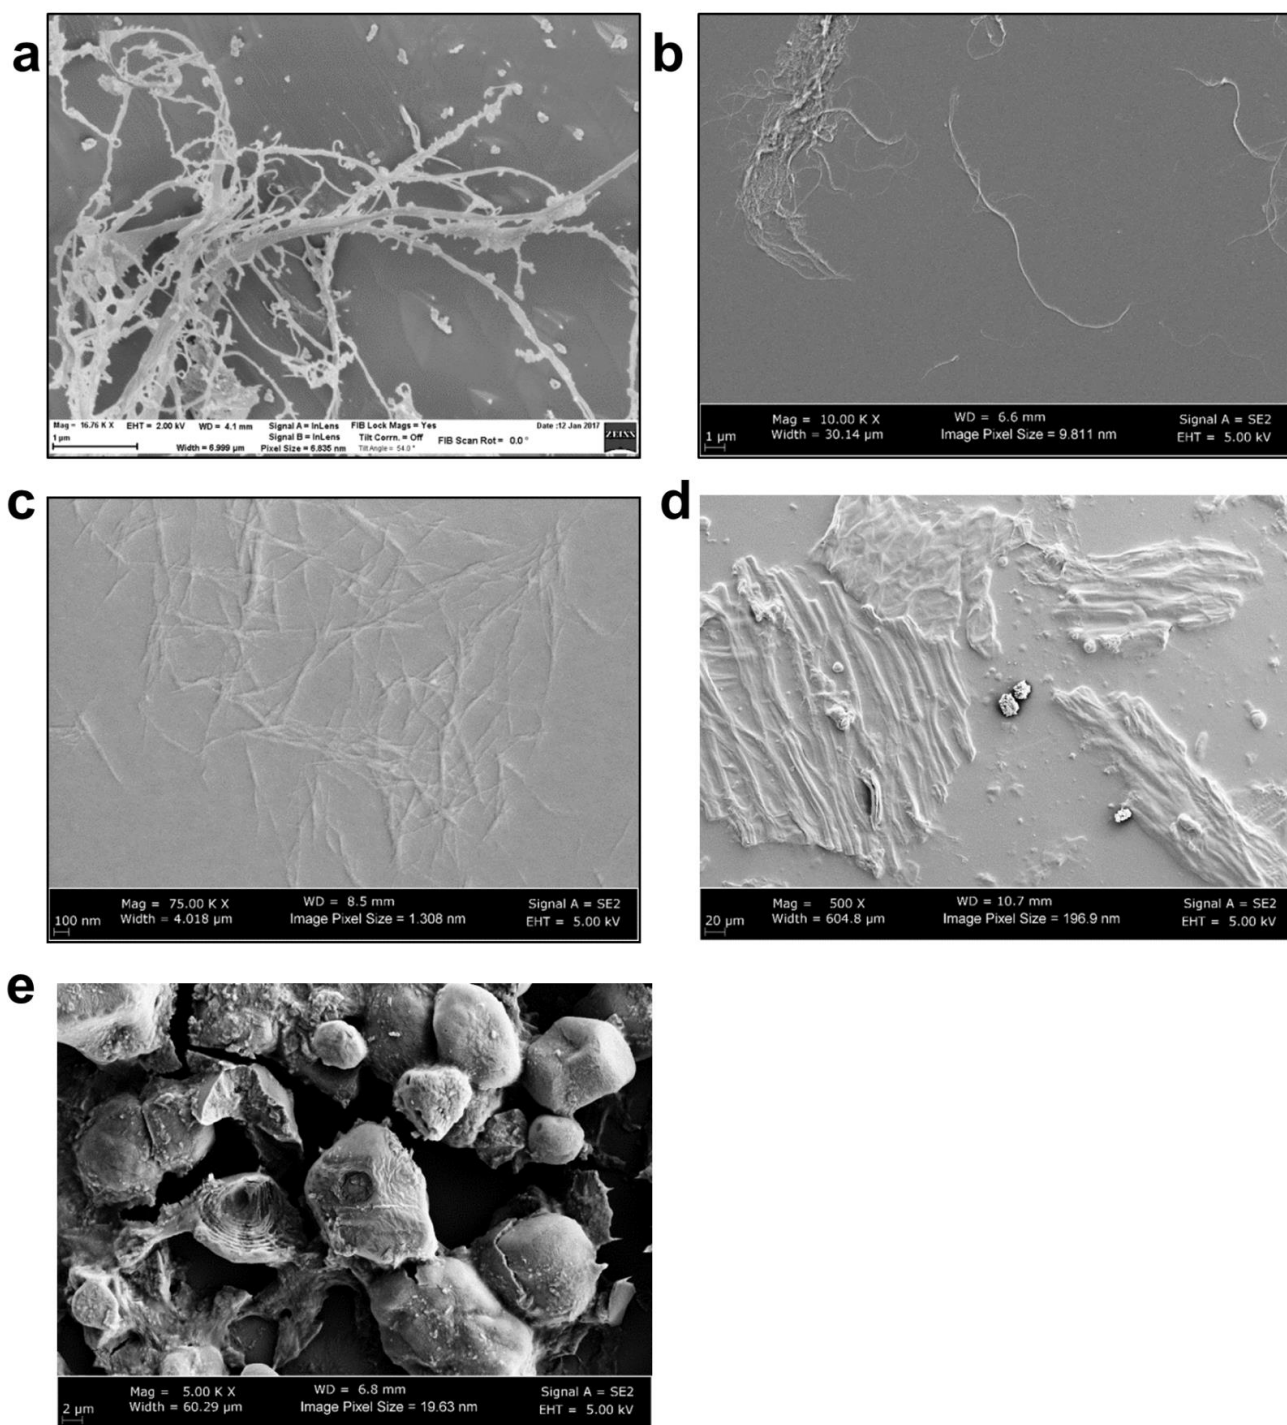

**Supplementary Figure 2 | SEM images of fibers studied.** a. 50 nm Fibrillar nanocellulose (CNF), b. 80 nm CNF, c. cellulose nanocrystals (CNC), d. Psyllium husk fibers, e. Wheat dextrin fibers.

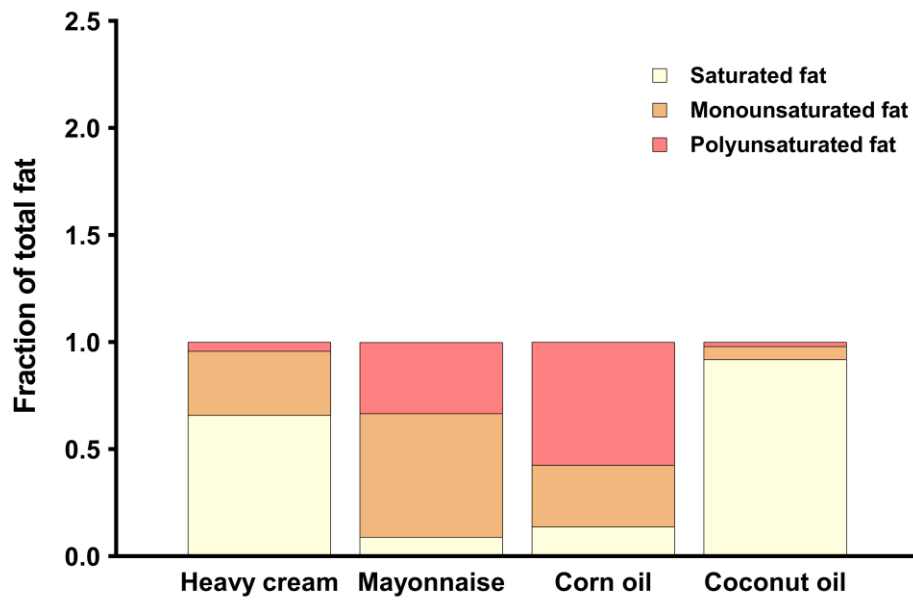

**Supplementary Figure 3** |Comparison of saturated, monounsaturated and polyunsaturated fatty acid composition of triglycerides in different food models tested.

A

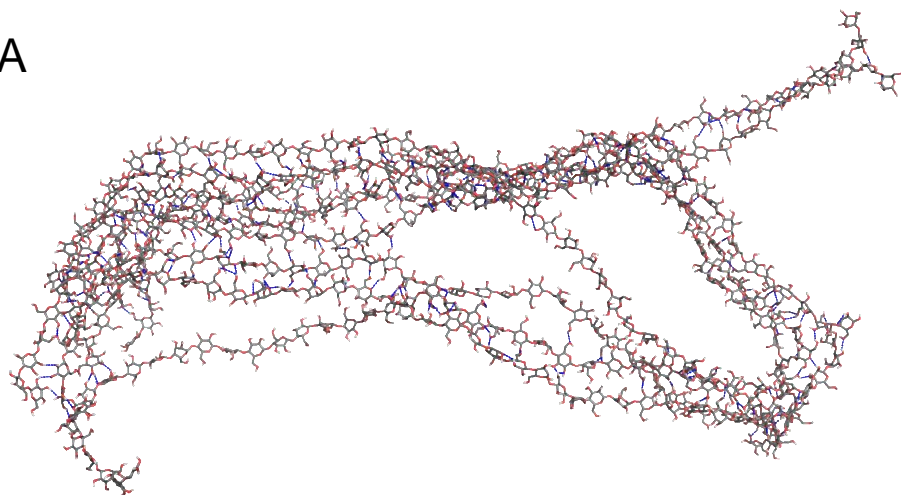

B

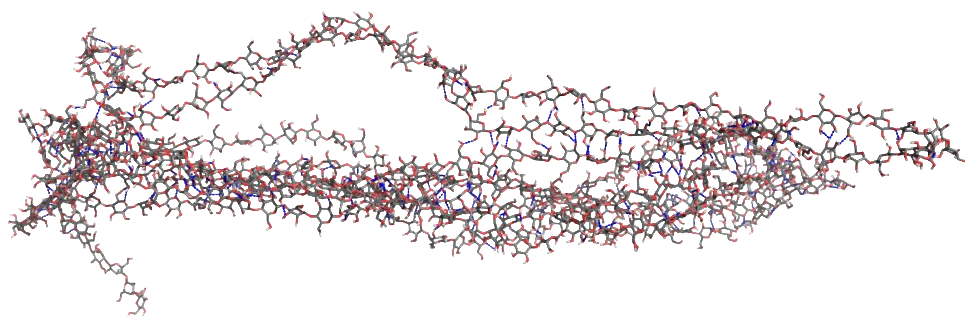

**Supplementary Figure 4** | A: Side view of self-assembled cellulose nanofiber. B: Side view of the same fiber. Colors indicate carbon (gray), oxygen (red), and hydrogen (white) as well as hydrogen bonds (blue).

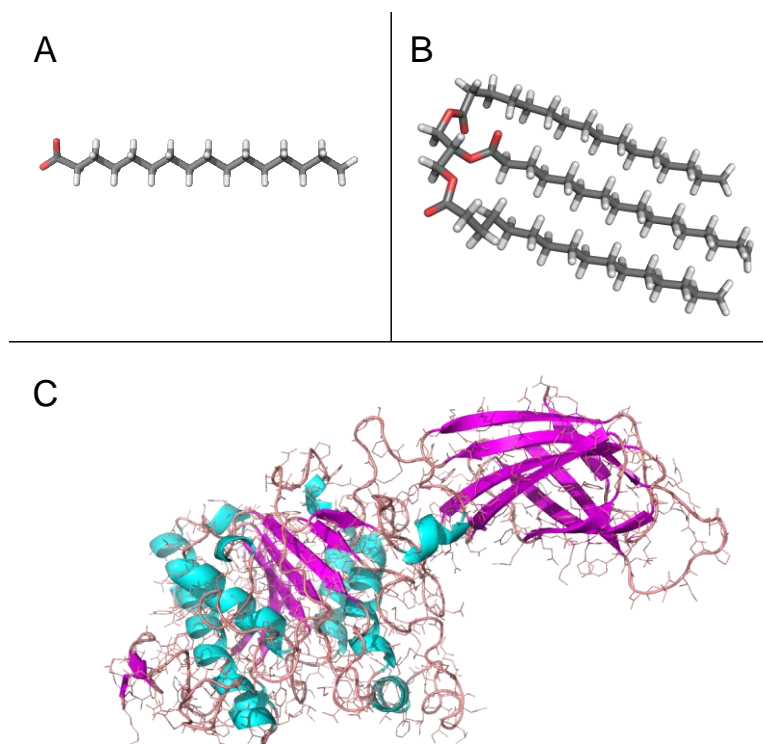

**Supplementary Figure 5** | Initial structures for A: Palmitic acid, B: Palmitic Triglyceride, and C: Human pancreatic lipase. Colors indicate carbon (gray), oxygen (red), and hydrogen (white). In C, colors indicate beta sheets (magenta) and alpha helices (cyan).

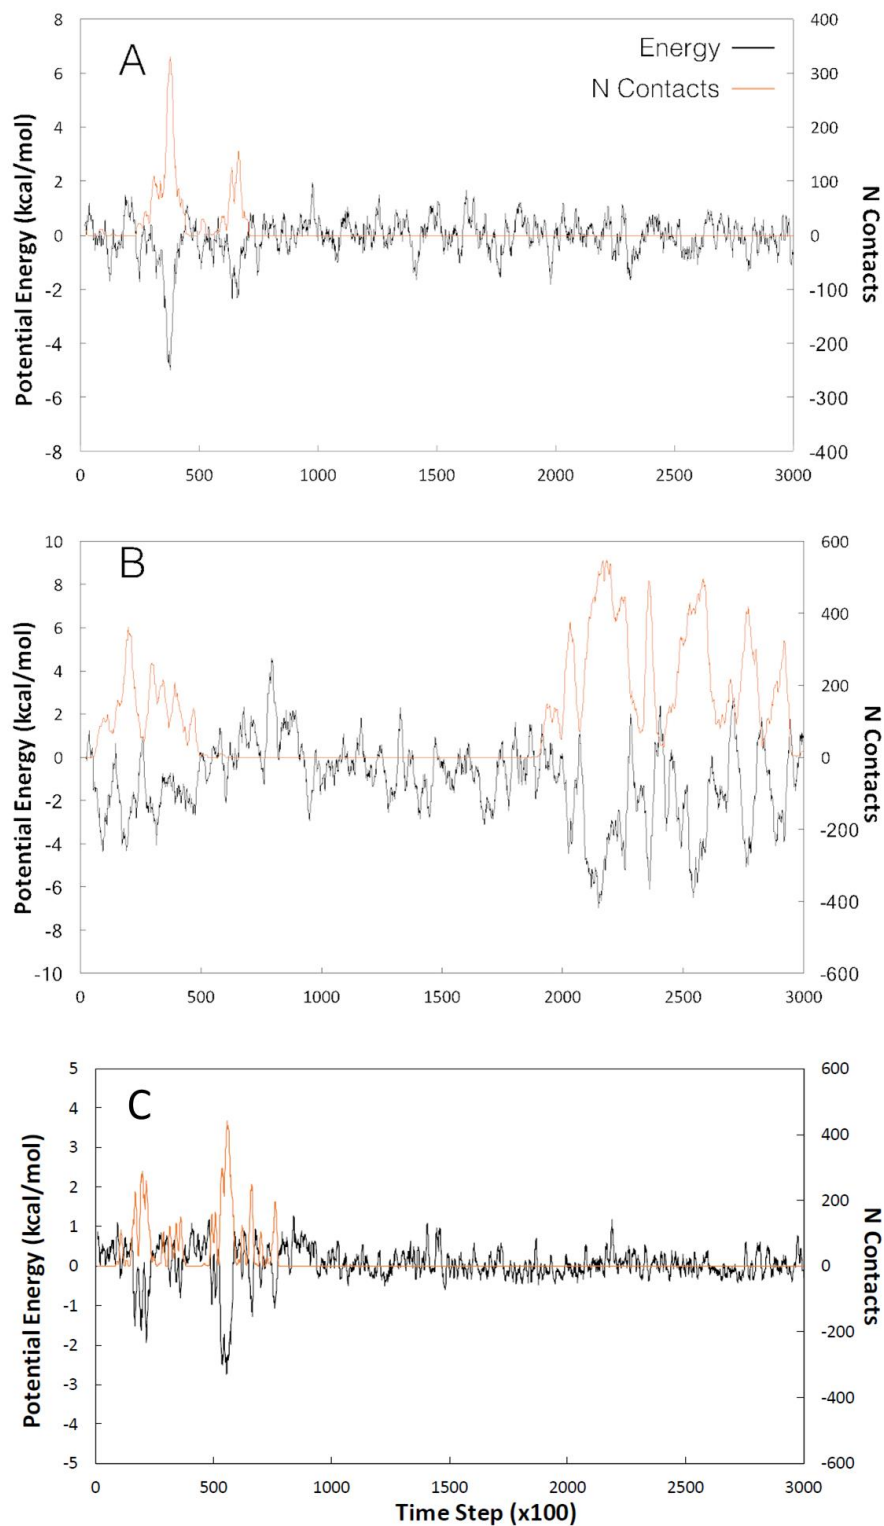

**Supplementary Figure 6** | Number of contacts (orange) and system potential energy (black) for A: free palmitic acid, B: palmitic triglyceride, and C: glycodeoxycholate, over a 300,000 time step excerpt from DMD simulations with a cellulose nanofiber.

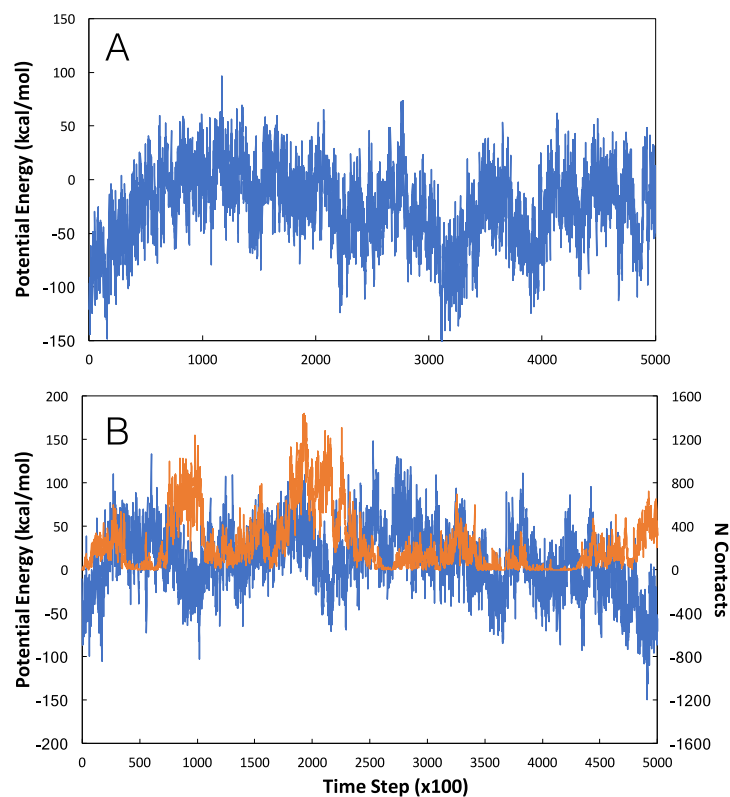

**Supplementary Figure 7** | Energy-contacts plots from a simulation of A: free pancreatic lipase and B: pancreatic lipase with a cellulose nanofiber

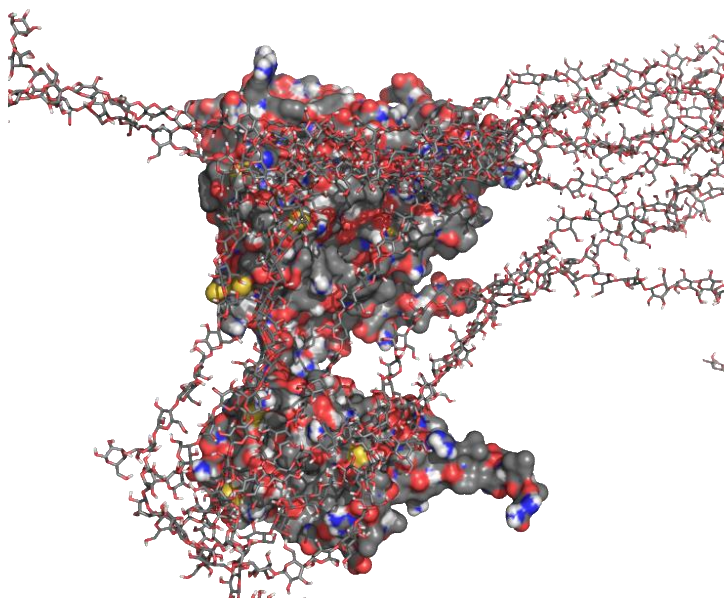

**Supplementary Figure 8** |The result of pancreatic lipase interactions with a cellulose nanofiber. For clarity, the enzyme is shown as a continuous surface.
