# Supplementary material
Source: PubMed Central journal article supplement (PMC6535802)
Supplement: NIHMS1023934-supplement-Supplementary_tables_1-3.pdf [file NIHMS1023934-supplement-Supplementary_tables_1-3.pdf]

## Supplementary Tables

**Supplementary Table 1:** Summary of the morphological characterization data

| ENMs      | Physical Properties<br>(SEM measurements)   |                  |              | Density<br>(g/cm <sup>3</sup> ) | Specific<br>surface<br>area (SSA)<br>m <sup>2</sup> /g | Endotoxin<br>(EU/mg) | Sterility<br>(CFU/g) |
|-----------|---------------------------------------------|------------------|--------------|---------------------------------|--------------------------------------------------------|----------------------|----------------------|
|           | Length<br>(nm)                              | Diameter<br>(nm) | Aspect Ratio |                                 |                                                        |                      |                      |
| CNF 50 nm | 6710 ± 5611                                 | 64 ± 29          | 107.6 ± 54.5 | 1.3120 ± 0.0185                 | 34                                                     | < LOD                | 0                    |
| CNF 80 nm | 6805 ± 4724                                 | 78 ± 25          | 85.9 ± 40.5  | 1.3410 ± 0.0194                 | 29                                                     | 5.46                 | 0                    |
| CNC 25 nm | 267 ± 91                                    | 25 ± 9           | 11.5 ± 3.2   | 1.5724 ± 0.0212                 | 93                                                     | 1.47                 | 0                    |
|           | Endotoxin Assay LOD 0.5 EU/mg (~0.05 ng/ml) |                  |              |                                 |                                                        |                      |                      |

**Supplementary Table 2: In vivo serum triglycerides as % change from pre-gavage (t0) in individual animals**

| <b>Cream only</b>  |        |        |        |        |        |        |       |
|--------------------|--------|--------|--------|--------|--------|--------|-------|
| <b>Animal #</b>    | 1      | 2      | 3      | 4      | 5      | 6      | 7*    |
| <b>1h</b>          | 138.33 | 404.98 | 236.40 | 211.19 | 232.53 | 130.97 | 36.09 |
| <b>2h</b>          | 203.39 | 415.84 | 207.94 | 241.54 | 156.55 | 232.85 | 38.70 |
| <b>4h</b>          | 106.61 | 157.14 | 121.77 | 64.17  | 123.91 | 16.40  | 36.09 |
| <b>Animal #</b>    | 8      | 9      | 10     | 11     | 12     | 13     |       |
| <b>1h</b>          | 95.71  | 200.61 | 95.88  | 192.96 | 136.01 | 93.80  |       |
| <b>2h</b>          | 32.53  | 65.03  | 118.91 | 152.54 | 178.90 | 52.11  |       |
| <b>4h</b>          | 26.27  | 28.70  | 65.92  | -16.85 | 18.45  | 38.66  |       |
| <b>Cream + CNF</b> |        |        |        |        |        |        |       |
| <b>Animal #</b>    | 1      | 2      | 3      | 4*     | 5      | 6      | 7     |
| <b>1h</b>          | 120.44 | 162.61 | 160.69 | 240.51 | 130.81 | 51.77  | 42.96 |
| <b>2h</b>          | 195.72 | 158.31 | 284.32 | 344.34 | 86.44  | 67.82  | 28.91 |
| <b>4h</b>          | 54.54  | 164.10 | 131.09 | 166.63 | 110.30 | -15.20 | 27.69 |
| <b>Animal #</b>    | 8      | 9      | 10     | 11     | 12     | 13     |       |
| <b>1h</b>          | 178.58 | 90.16  | 87.88  | 124.63 | 156.57 | 74.17  |       |
| <b>2h</b>          | 89.22  | 129.17 | 83.87  | 104.23 | 84.53  | 117.08 |       |
| <b>4h</b>          | 50.67  | 87.53  | 32.69  | -18.68 | 31.00  | 32.98  |       |

\* outliers removed from statistical analysis: In the case of the outlier excluded from the cream only group (animal #7 from that group), the percent postprandial rise in TG at 1 hour was only 20% of the mean (and 1.64 standard deviations below the mean) of the other 12 animals, and substantially less than that in any of the other animals in the group, suggesting a failed or incomplete gavage. In the case of the outlier excluded from the cream + CNF group (animal #4 from that group), the post prandial increase in TG at 1 hour was 2.76 standard deviations above the mean of the other 12 animals in the group.

**Supplementary Table 3: fatty acid profiles of food models\***

|               | Heavy Cream |             | Corn Oil |             | Mayonnaise |             | Coconut Oil |             |
|---------------|-------------|-------------|----------|-------------|------------|-------------|-------------|-------------|
| Weight (g)    | 100         |             | 100      |             | 100        |             | 100         |             |
| Total fat (g) | 36.08       |             | 100      |             | 74.85      |             | 99.06       |             |
| Fatty acid    | mg/100 g    | Frax of fat | mg/100 g | Frax of fat | mg/100 g   | Frax of fat | mg/100 g    | Frax of fat |
| C4:0          | 732         | 0.023       |          |             |            |             | 9           | 0.000       |
| C6:0          | 609         | 0.020       |          |             |            |             | 477         | 0.005       |
| C8:0          | 384         | 0.012       |          |             |            |             | 6802        | 0.075       |
| C10:0         | 905         | 0.029       |          |             |            |             | 5390        | 0.060       |
| C12:0         | 1050        | 0.034       |          |             |            |             | 41840       | 0.462       |

|                              |       |       |       |       |       |       |       |       |
|------------------------------|-------|-------|-------|-------|-------|-------|-------|-------|
| C14:0                        | 3331  | 0.107 |       |       | 55    | 0.001 | 16653 | 0.184 |
| C15:0                        | 353   | 0.011 |       |       | 13    | 0.000 | 15    |       |
| C16:0                        | 9298  | 0.298 | 5076  | 0.053 | 7909  | 0.108 | 8636  | 0.095 |
| C17:0                        | 210   | 0.007 |       |       | 71    | 0.001 | 9     |       |
| C18:0                        | 3572  | 0.115 | 2028  | 0.021 | 3099  | 0.042 | 2516  | 0.028 |
| C19:0                        |       |       |       |       |       |       |       |       |
| C20:0                        | 47    | 0.002 | 615   | 0.006 | 232   | 0.003 | 76    | 0.001 |
| C21:0                        |       |       |       |       |       |       |       |       |
| C22:0                        | 15    | 0.000 | 306   | 0.003 | 240   | 0.003 | 19    | 0.000 |
| C23:0                        |       |       |       |       |       |       |       |       |
| C24:0                        | 9     | 0.000 |       |       | 84    | 0.001 | 31    | 0.000 |
| <b>Saturated total</b>       | 20515 | 0.658 | 8025  | 0.084 | 11703 | 0.160 | 82473 | 0.911 |
| C14:1                        | 344   | 0.011 |       |       |       |       |       |       |
| C16:1                        | 656   | 0.021 | 191   | 0.002 | 88    | 0.001 | 16    | 0.000 |
| C17:1                        | 65    | 0.002 |       |       | 41    | 0.001 |       |       |
| C18:1                        | 7968  | 0.256 |       |       | 16455 | 0.225 |       |       |
| C18:1                        |       |       | 57142 | 0.597 |       |       | 6274  | 0.069 |
| C20:1                        | 65    | 0.002 | 1204  | 0.013 | 238   | 0.003 | 41    | 0.000 |
| C22:1                        | 3     | 0.000 |       |       | 22    | 0.000 |       |       |
| <b>Monounsaturated total</b> | 9101  | 0.292 | 58537 | 0.612 | 16844 | 0.230 | 6331  | 0.070 |
| C16:2                        |       |       |       |       |       |       |       |       |
| C18:2                        | 1294  | 0.041 | 23315 | 0.244 | 39146 | 0.535 | 1683  | 0.019 |
| C18:3                        | 128   | 0.004 | 5798  | 0.061 | 5456  | 0.074 | 19    | 0.000 |
| C20:2                        | 8     | 0.000 |       |       | 30    | 0.000 |       |       |
| C20:3                        | 41    | 0.001 |       |       | 2     | 0.000 |       |       |
| C20:4                        | 58    | 0.002 |       |       | 50    | 0.001 |       |       |
| C20:5                        | 9     | 0.000 |       |       |       |       |       |       |
| C22:4                        | 10    | 0.000 |       |       |       |       |       |       |
| C22:5                        | 20    | 0.001 |       |       |       |       |       |       |
| C22:6                        |       |       |       |       | 5     | 0.000 |       |       |
| <b>Polyunsaturated total</b> | 1568  | 0.050 | 29113 | 0.304 | 44689 | 0.610 | 1702  | 0.019 |

\*From USDA Agricultural Research Service, USDA Branded Food Products Database  
(<https://ndb.nal.usda.gov/ndb/>)
